# Supplementary material
Source: PubMed Central journal article supplement (PMC4283220)
Supplement: NIHMS642951-supplement-1.pdf [file NIHMS642951-supplement-1.pdf]

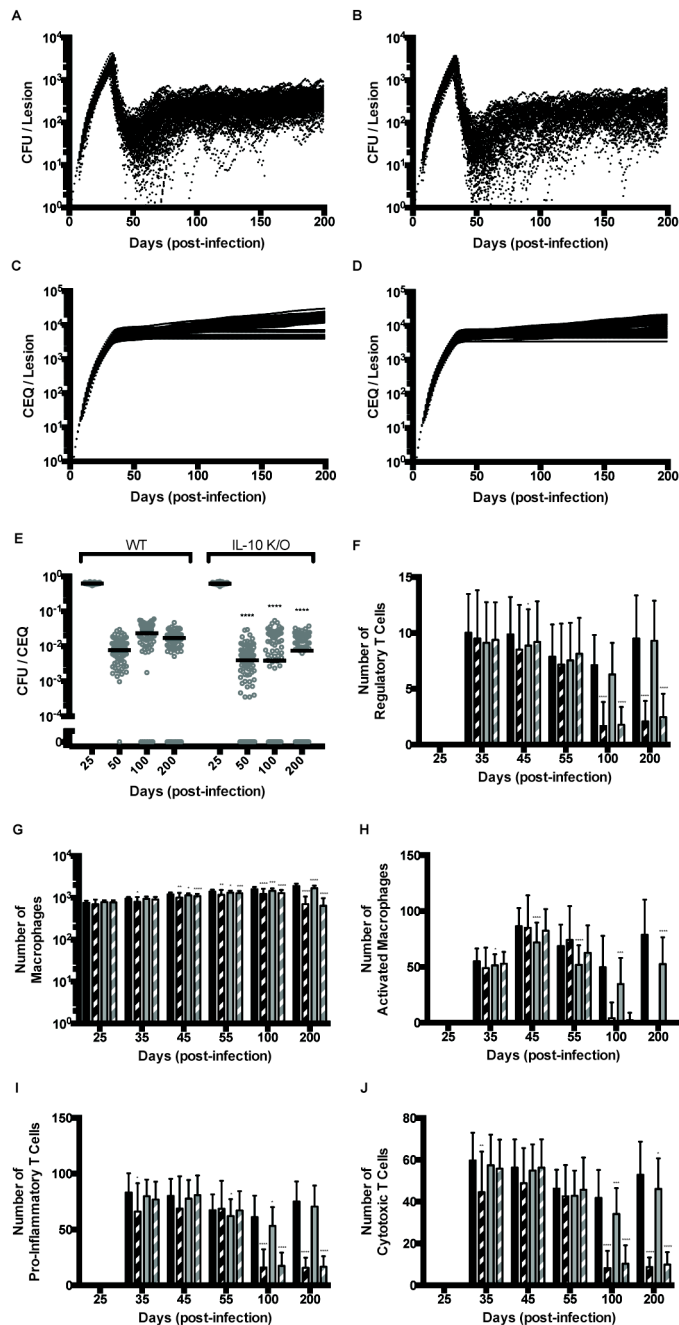

**Supplementary Figure S1.** A. Simulated temporal CFU data for WT lesions. B. Simulated temporal CFU data for IL-10 K/O lesions. Dots represent individual lesions at the specified time point. C. Simulated temporal CEQ data for WT lesions. D. Simulated temporal CEQ data for IL-10 K/O lesions. E. CFU/CEQ for WT and IL-10 K/O lesions, including both sterile and non-sterile lesions. F. Regulatory T cells. G. Total macrophages. H. Activated macrophages. I. Pro-Inflammatory T cell. J. Cytotoxic T cells. Dots represent individual lesions at the specified time point. Both sterile and non-sterile lesions are included. Non-sterile lesions are displayed as solid bars and sterile lesions are displayed as striped bars. Bars are representative of mean values with error bars showing SD. For all panels: \*  $p \leq 0.05$ , \*\*  $p \leq 0.01$ , \*\*\*  $p \leq 0.001$ , \*\*\*\*  $p \leq 0.0001$ ,  $N = 100$ .

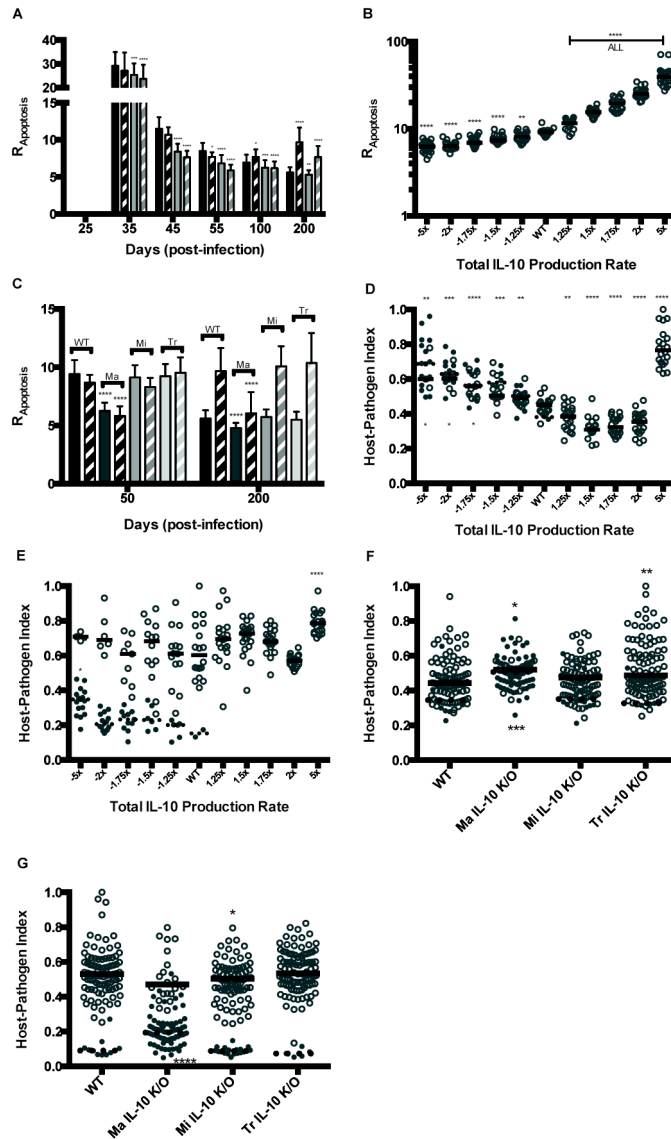

**Supplementary Figure S2.**  $R_{\text{Apoptosis}}$  is defined as the ratio of infected macrophage apoptosis/necrosis to resting macrophage apoptosis/necrosis (1, 2). Thus, it is a metric of ‘good’ apoptosis to ‘bad’ apoptosis. A.  $R_{\text{Apoptosis}}$  for WT (black bars) and IL-10 K/O (grey bars) lesions. Non-sterile lesions are displayed as solid bars and sterile lesions are displayed as striped bars. Bars are representative of mean values with error bars showing SD. B.  $R_{\text{Apoptosis}}$  for different levels of total IL-10 production (5-fold reduction to 5-fold increase) at 50 days post-infection. Dots represent individual lesions. Lines indicate the median values. C.  $R_{\text{Apoptosis}}$  for WT, IL-10 K/O, Ma IL-10 K/O, Mi IL-10 K/O, Tr IL-10 K/O lesions at 200 days post-infection. Both sterile and non-sterile lesions are included. Non-sterile lesions are displayed as solid bars and sterile lesions are displayed as striped bars. Bars are representative of mean values with error bars showing SD. The modified Host-Pathogen Index is defined as the scaled measure (between 0 and 1) of lesion function based on the CFU and healthy macrophage apoptosis/necrosis levels (3). Lower values indicate better lesion function. D, E. Host-Pathogen Index for different levels of total IL-10 production (5-fold reduction to 5-fold increase) at 50 and 200 days post-infection, respectively. Dots represent individual lesions. Lines indicate the median values. F, G. Host-

Pathogen Index for WT, IL-10 K/O, Ma IL-10 K/O, Mi IL-10 K/O, Tr IL-10 K/O lesions at 50 and 200 days post-infection, respectively. Solid lines indicate the median values for non-sterile lesions. Dotted lines indicate the median values for sterile lesions. Open circles are non-sterile lesions. Closed circles are sterile lesions. For all panels: \*  $p \leq 0.05$ , \*\*  $p \leq 0.01$ , \*\*\*  $p \leq 0.001$ , \*\*\*\*  $p \leq 0.0001$ ,  $N = 100$ . Significance values above the data points are for non-sterile lesions while significance values below the data points are for sterile lesions.

**Supplemental Table I.** Changes to ABM Rules/Parameters and NHP Data used in Model Calibration

| Changes in ABM Rules From (3)                                                                                                                  |                                                                                                                                                                                                                                                                            |                                                                                                                                                                                                                                                                                                                                                                                                             |                           |
|------------------------------------------------------------------------------------------------------------------------------------------------|----------------------------------------------------------------------------------------------------------------------------------------------------------------------------------------------------------------------------------------------------------------------------|-------------------------------------------------------------------------------------------------------------------------------------------------------------------------------------------------------------------------------------------------------------------------------------------------------------------------------------------------------------------------------------------------------------|---------------------------|
| Previous Rule                                                                                                                                  | New Rule                                                                                                                                                                                                                                                                   | Reason/References                                                                                                                                                                                                                                                                                                                                                                                           |                           |
| Non-replicating <i>Mtb</i> trapped in caseated compartments can only be killed by hypoxia at a specified death rate.                           | Additionally, non-replicating <i>Mtb</i> trapped in caseated compartments in the Moore neighborhood of an activated macrophage can be killed at a reduced rate of activated macrophage killing ( $1/10^{\text{th}}$ ).                                                     | Realistically <i>in-vivo</i> movement of cells is not constrained to binary (yes/no) decisions (e.g. cell squeezing). Thus, we allow activated macrophages to access compartments in their Moore neighborhood to alleviate artifacts of movement restrictions.                                                                                                                                              |                           |
| Maximal rates of T cell recruitment are allowed as soon as T cell recruitment is begins.                                                       | A time delay now exists such that T cell recruitment rates increase linearly to the maximum rates over the specified time interval.                                                                                                                                        | (4)                                                                                                                                                                                                                                                                                                                                                                                                         |                           |
| Once a compartment becomes caseated due to passing a threshold of death events it stays caseated for the entire simulation.                    | Activated macrophages have an associated probability of initiating a healing event. If the compartment is marked for healing there is an associated time with the healing process. Once the time interval is passed the compartment changes from caseated to non-caseated. | (5–7)                                                                                                                                                                                                                                                                                                                                                                                                       |                           |
| Regulatory T cells modulate their deactivation capacity based on the relative bound IL-10 and bound TNF molecules on the cells surface.        | Now, regulatory T cells have a baseline deactivation capacity. When IL-10 production is deleted from regulatory T cells the deactivation capacity is up regulated by a specified factor.                                                                                   | (8, 9)                                                                                                                                                                                                                                                                                                                                                                                                      |                           |
| Lie-type operator splitting (first order accurate) was employed to separate the coupled reaction/diffusion PDEs into three different problems. | Strang-type splitting (second-order accurate) is now employed to separate the coupled reaction/diffusion PDEs into three different problems.                                                                                                                               | Increases the accuracy of the splitting technique allowing for larger solution time steps for each of the three different problems.                                                                                                                                                                                                                                                                         |                           |
| Each pro-inflammatory T cell was given a probability of activating macrophage STAT1 though IFN- $\gamma$ at each time step.                    | Pro-inflammatory T cells are now classified by the ability to secrete IFN- $\gamma$ and activate STAT1 based on a specified probability when it is born.                                                                                                                   | Although the previous rule gives correct percentages of T cells secreting IFN- $\gamma$ at any specific time point the population of IFN- $\gamma$ secreting T cells changes with every time step when the probability is re-evaluated. Thus, the new rule identifies IFN- $\gamma$ secreting and non-secreting T cells upon birth and the classification persists over the entire life span of the T cell. |                           |
| All pro-inflammatory and cytotoxic T cells are capable of producing TNF- $\alpha$                                                              | Pro-inflammatory and cytotoxic T cells are now classified by the ability to secrete TNF- $\alpha$ based on a specified probability when it is born.                                                                                                                        | (Unpublished data – Personal Communication J. Flynn, University of Pittsburgh)                                                                                                                                                                                                                                                                                                                              |                           |
| NHP Data Used to Calibrate GranSim From (10–13)                                                                                                |                                                                                                                                                                                                                                                                            |                                                                                                                                                                                                                                                                                                                                                                                                             |                           |
| NHP ID                                                                                                                                         | Days Post-Infection of Necropsy                                                                                                                                                                                                                                            | Number of Non-Sterile Lesions                                                                                                                                                                                                                                                                                                                                                                               | Number of Sterile Lesions |

|       |     |    |    |
|-------|-----|----|----|
| 8709  | 26  | 9  | 0  |
| 7010  | 27  | 35 | 1  |
| 8109  | 27  | 5  | 0  |
| 6810  | 28  | 18 | 0  |
| 7709  | 28  | 16 | 0  |
| 7809  | 28  | 11 | 0  |
| 8809  | 28  | 16 | 1  |
| 7210  | 29  | 22 | 0  |
| 7110  | 30  | 8  | 0  |
| 2412  | 83  | 13 | 1  |
| 17111 | 84  | 16 | 2  |
| 2512  | 85  | 21 | 2  |
| 3609  | 89  | 7  | 3  |
| 9611  | 93  | 12 | 0  |
| 19608 | 136 | 7  | 6  |
| 8509  | 139 | 6  | 3  |
| 6409  | 140 | 4  | 0  |
| 21208 | 173 | 10 | 2  |
| 8609  | 173 | 16 | 10 |
| 9711  | 175 | 10 | 5  |
| 9209  | 187 | 5  | 11 |
| 7009  | 194 | 4  | 11 |
| 9511  | 198 | 3  | 3  |
| 5610  | 209 | 2  | 4  |
| 23210 | 211 | 26 | 3  |
| 21310 | 230 | 22 | 15 |
| 5008  | 247 | 4  | 0  |
| 10808 | 267 | 2  | 1  |
| 22210 | 267 | 9  | 19 |
| 21410 | 267 | 13 | 9  |
| 21508 | 271 | 3  | 6  |
| 4808  | 296 | 1  | 2  |

*ABM Parameters and Changes in Values of ABM Parameters From (3)*

| Parameter                  | Parameter Description                                          | Previous Value       | New Value             |
|----------------------------|----------------------------------------------------------------|----------------------|-----------------------|
| $\alpha_{Bi}$ (per 10 min) | Intracellular Mtb growth rate                                  | $1.4 \times 10^{-3}$ | $3 \times 10^{-3}$    |
| $\alpha_{Be}$ (per 10 min) | Extracellular Mtb growth rate                                  | $7 \times 10^{-4}$   | $1.25 \times 10^{-3}$ |
| $N_{caseum}$               | Number of cell deaths required for caseation                   | 15                   | 10                    |
| $t_{heal}$ (days)          | Healing time of caseated compartment                           | ---                  | 16                    |
| $\tau_{chem}$ (molecules)  | Minimum chemokine concentration threshold                      | 2                    | 1                     |
| $s_{chem}$ (molecules)     | Saturating chemokine concentration threshold                   | 2000                 | 400                   |
| $r_{CCL2}$ (molecules/s)   | Full secretion rate of CCL2 by macrophages                     | 4.14                 | 6                     |
| $r_{CCL5}$ (molecules/s)   | Full secretion rate of CCL5 by macrophages                     | 4.14                 | 6                     |
| $r_{CXCL9}$ (molecules/s)  | Full secretion rate of CXCL9/10/11 by macrophages              | 8.28                 | 12                    |
| $B_{actM}$                 | Number of extracellular Mtb activating NF- $\kappa$ B in a mac | 239                  | 200                   |

|                                    |                                                                                             |                        |                       |
|------------------------------------|---------------------------------------------------------------------------------------------|------------------------|-----------------------|
| $N_{burst}$                        | Number of intracellular Mtb that leads to $M_{ci}$ bursting                                 | 20                     | 15                    |
| $N_{ak}$ (per 10 min)              | Number of extracellular Mtb killed by $M_a$                                                 | 3                      | 5                     |
| $t_{moveMa}$ (hour)                | Time interval for $M_a$ movement                                                            | 7.8                    | 2.3                   |
| $M_{recMax}$                       | Maximum recruitment probability for $M_r$ recruitment                                       | 0.09                   | 0.20                  |
| $\tau_{recMacTNF}$                 | TNF threshold for $M_r$ recruitment                                                         | 0.014                  | 0.05                  |
| $h_{MacTNF}$                       | Half-saturation of TNF for $M_r$ recruitment                                                | 0.5                    | 0.55                  |
| $P_{heal}$                         | Probability of healing a caseated compartment by $M_a$                                      | ---                    | 0.014                 |
| $P_{Fas/FasL}$                     | Probability of Fas/FasL apoptosis by $T_r$                                                  | 0.0095                 | 0.02                  |
| $P_{cytKill}$                      | Probability of $T_c$ killing $M_i$ or $M_{ci}$                                              | 0.0098                 | 0.01                  |
| $T_{moveM}$                        | Probability of T cell moving to a mac-containing location                                   | 0.027                  | 0.07                  |
| $P_{IFN-Tgam}$                     | Probability of a $T_g$ secreting IFN- $\gamma$                                              | ---                    | 0.35                  |
| $P_{IFN-Range}$                    | Range of probability of a $T_g$ secreting IFN- $\gamma$                                     | ---                    | 0.10                  |
| $P_{IFN-Moore}$                    | Probability of a $T_g$ activating STAT1 through IFN- $\gamma$ in its Moore neighborhood     | ---                    | 0.25                  |
| $P_{TNF-Tcyt}$                     | Probability of a $T_c$ secreting TNF                                                        | ---                    | 0.07                  |
| $P_{TNF-Tgam}$                     | Probability of a $T_g$ secreting TNF                                                        | ---                    | 0.07                  |
| $P_{Deact-Treg}$                   | Probability of $T_r$ deactivation of agents                                                 | ---                    | 0.015                 |
| $F_{Deact-Treg}$                   | Factor that describes increase in probability of $T_r$ deactivation in the absence of IL-10 | ---                    | 2.72                  |
| $t_{recEnabled}$ (days)            | Time T cell recruitment is enabled                                                          | ---                    | 28                    |
| $t_{recDealy}$ (days)              | Time delay in maximal T cell recruitment                                                    | ---                    | 5                     |
| $T_{recTgamMax}$                   | Maximum recruitment probability for $T_r$ recruitment                                       | 0.0713                 | 0.096                 |
| $\tau_{recTgamTNF}$                | TNF threshold for $T_r$ recruitment                                                         | 0.014                  | 0.1                   |
| $h_{TgamTNF}$                      | Half-saturation of TNF for $T_r$ recruitment                                                | 0.3                    | 0.4                   |
| $T_{recTcytMax}$                   | Maximum recruitment probability for $T_c$ recruitment                                       | 0.0505                 | 0.08                  |
| $\tau_{recTcytTNF}$                | TNF threshold for $T_c$ recruitment                                                         | 0.014                  | 0.1                   |
| $h_{TcytTNF}$                      | Half-saturation of TNF for $T_c$ recruitment                                                | 0.3                    | 0.4                   |
| $T_{recTregMax}$                   | Maximum recruitment probability for $T_{reg}$ recruitment                                   | 0.0221                 | 0.024                 |
| $\tau_{recTcytTNF}$                | TNF threshold for $T_c$ recruitment                                                         | 0.014                  | 0.1                   |
| $h_{TcytTNF}$                      | Half-saturation of TNF for $T_c$ recruitment                                                | 0.3                    | 0.4                   |
| $k_{NFkB} ((\#/cell)^{-1}s^{-1})$  | Rate constant for TNF-induced NFkB activation in macrophages                                | $1.41 \times 10^{-8}$  | $1.62 \times 10^{-8}$ |
| $k_{apopt} ((\#/cell)^{-1}s^{-1})$ | Rate constant for TNF-induced apoptosis in all cell types                                   | $3.45 \times 10^{-10}$ | $2.22 \times 10^{-9}$ |
| $\tau_{NFkB} (\#/cell)$            | Cell surface sTNF/TNFR1 threshold for TNF-induced NFkB activation                           | 65                     | 81                    |
| $\tau_{apopt} (\#/cell)$           | Internalized sTNF/TNFR1 threshold for TNF-induced apoptosis                                 | 1728                   | 2028                  |
| $S_{apopt} (\#/cell)$              | Saturation concentration of internalized sTNF/TNFR1 for TNF-induced apoptosis               | 4022                   | 4691                  |
| $S_{NFkB}$                         | Saturation fraction of sTNF/TNFR1 for TNF-induced NFkB activation                           | 0.43                   | 0.541                 |
| $k_{synthMacInf} (\#/cell.s)$      | Full synthesis rate of soluble IL10 by infected macrophages                                 | 0.061                  | 0.02                  |
| $k_{synthMacAct} (\#/cell.s)$      | Full synthesis rate of soluble IL10 by activated macrophages                                | 0.41                   | 0.30                  |

All NHPs were infected with the Erdman strain of *Mycobacterium tuberculosis* except 7010 and 7210 which were infected with barcoded Erdman strains from (11).

**Supplemental Table II.** Uncertainty and Sensitivity Analysis Partial Rank Correlation Coefficients of IL-10 Parameters

| Selected Model Outputs at 200 Days Post-Infection |            |           |       |          |       |           |               |                 |            |            |                  |                   |                   |                   |                  |
|---------------------------------------------------|------------|-----------|-------|----------|-------|-----------|---------------|-----------------|------------|------------|------------------|-------------------|-------------------|-------------------|------------------|
| Model Outputs                                     | $D_{IL10}$ | $k_{deg}$ | $K_D$ | $k_{on}$ | $k_t$ | $k_{int}$ | $IL10R_{Mac}$ | $IL10R_{Tcell}$ | $\delta_I$ | $\gamma_I$ | $F_{Deact-Treg}$ | $k_{synthMacInf}$ | $k_{synthMacAct}$ | $h_{synthMacAct}$ | $k_{synthTcell}$ |
| TNF-Induced Processes                             |            |           |       |          |       |           |               |                 |            |            |                  |                   |                   |                   |                  |
| Apoptosis/Necrosis – $M_r$                        | +          | +++       |       | ---      |       | +++       | ---           | -               |            | +++        | +                | ---               | ---               | +                 | -                |
| Apoptosis/Necrosis – $M_i$                        |            | +         | +     | -        |       | +         | --            |                 | +          |            | ---              | ---               | +                 |                   | +                |
| Apoptosis/Necrosis – $M_{ci}$                     |            |           |       | -        |       |           | -             |                 | +          |            | --               | ---               | +                 |                   | +                |
| Apoptosis/Necrosis – $M_a$                        | +          | +++       |       | ---      |       | +++       | ---           | -               |            | +++        | ++               | ---               | ---               | +                 | -                |
| Apoptosis/Necrosis – T cells                      | +          | +++       |       | ---      |       | +++       | ---           |                 |            | +++        |                  | ---               | ---               | +                 | -                |
| Activation – $M_r$                                | +          | +++       |       | ---      |       | +++       | ---           | -               |            | +++        | ++               | ---               | -                 | +                 | -                |
| Activation – $M_i$                                |            |           | +     |          |       |           |               |                 | +          | -          | -                | ---               | +                 |                   | +                |
| T-Cell Outputs                                    |            |           |       |          |       |           |               |                 |            |            |                  |                   |                   |                   |                  |
| CTL Killing                                       |            | ---       |       | +++      |       | ---       | +++           |                 |            | ---        |                  | +++               | +++               |                   | ++               |
| Fas/FasL Killing                                  |            | ---       |       | +++      |       | ---       | +++           |                 |            | ---        |                  | +++               | +++               |                   | ++               |
| Bacterial Outputs                                 |            |           |       |          |       |           |               |                 |            |            |                  |                   |                   |                   |                  |
| Intracellular <i>Mtb</i>                          | -          | --        |       | ++       |       | ---       | +++           |                 |            | ---        |                  | +++               | +++               | -                 | ++               |
| Extracellular <i>Mtb</i>                          |            | ---       |       | +++      |       | ---       | +++           |                 |            | ---        | -                | +++               | +++               |                   | +                |
| CFU per Lesion                                    |            | ---       |       | +++      |       | ---       | +++           |                 |            | ---        | -                | +++               | +++               |                   | ++               |
| CFU/CEQ                                           |            | ---       |       | +++      |       | ---       | +++           |                 |            | ---        |                  | +++               | +++               |                   | +                |
| Cellular-Level Outputs                            |            |           |       |          |       |           |               |                 |            |            |                  |                   |                   |                   |                  |
| $M_r$                                             |            | +++       |       | -        |       | +++       | -             |                 |            |            | +++              | ---               |                   |                   |                  |
| $M_i$                                             | -          | --        |       | ++       |       | ---       | +++           |                 |            | ---        |                  | +++               | +++               | -                 | ++               |
| $M_{ci}$                                          | -          | ---       |       | ++       |       | ---       | +++           |                 |            | ---        |                  | +++               | +++               | -                 | ++               |
| $M_a$                                             |            | +         |       |          |       |           |               |                 | -          | -          | +++              |                   | +                 |                   |                  |
| $T_g$                                             |            |           |       |          |       | -         | +             |                 | --         | ---        | +++              | +                 | +                 |                   | +                |
| $T_c$                                             |            |           |       |          |       | -         | +             |                 | --         | ---        | +++              | ++                | +                 |                   | +                |
| $T_r$                                             |            |           |       |          |       |           |               |                 | --         | ---        | +++              | +                 | +                 |                   |                  |
| Tissue-Level Outputs                              |            |           |       |          |       |           |               |                 |            |            |                  |                   |                   |                   |                  |
| Caseous Necrosis                                  |            | -         | -     | +        |       | ---       | +++           |                 | --         | ---        | +++              | +++               | +                 |                   | +                |
| Lesion Size                                       |            |           |       |          |       | -         | +             |                 | -          | ---        | +++              | +++               | ++                |                   |                  |
| [TNF- $\alpha$ ]                                  |            | +         |       |          |       |           |               |                 | -          | -          | +++              |                   |                   |                   |                  |
| [IL-10]                                           |            | ---       |       |          |       | -         |               |                 | -          | ---        | +++              | +++               | +++               |                   | +++              |
| [Chemokines]                                      |            |           |       |          |       | -         |               |                 | -          | ---        | +++              | +                 | +++               |                   |                  |
| Selected Model Outputs at 50 Days Post-Infection  |            |           |       |          |       |           |               |                 |            |            |                  |                   |                   |                   |                  |
| Model Outputs                                     | $D_{IL10}$ | $k_{deg}$ | $K_D$ | $k_{on}$ | $k_t$ | $k_{int}$ | $IL10R_{Mac}$ | $IL10R_{Tcell}$ | $\delta_I$ | $\gamma_I$ | $F_{Deact-Treg}$ | $k_{synthMacInf}$ | $k_{synthMacAct}$ | $h_{synthMacAct}$ | $k_{synthTcell}$ |
| TNF-Induced Processes                             |            |           |       |          |       |           |               |                 |            |            |                  |                   |                   |                   |                  |
| Apoptosis/Necrosis – $M_r$                        | +          | +++       |       | ---      |       | +++       | ---           |                 |            | +++        |                  | ---               | ---               |                   | -                |
| Apoptosis/Necrosis – $M_i$                        | +          | +         |       | --       |       | +++       | ---           |                 |            | +++        | -                | ---               |                   | +                 |                  |
| Apoptosis/Necrosis – $M_{ci}$                     |            | +         |       | --       |       | +++       | --            |                 | +          |            | -                | ---               |                   |                   |                  |
| Apoptosis/Necrosis – $M_a$                        | +          | +++       |       | ---      |       | +++       | ---           |                 |            | +++        | +                | ---               | ---               | +                 | -                |
| Apoptosis/Necrosis – T cells                      | +          | +++       |       | ---      |       | +++       | ---           |                 |            | +++        |                  | ---               | ---               |                   | -                |

|                               |   |     |     |     |     |     |     |     |     |     |
|-------------------------------|---|-----|-----|-----|-----|-----|-----|-----|-----|-----|
| Activation – M <sub>r</sub>   | + | +++ | --- | +++ | --- | +++ | +   | --- | --- | -   |
| Activation – M <sub>i</sub>   |   | +   | +   | -   | +++ | --  | +   | -   | --- |     |
| <b>T-Cell Outputs</b>         |   |     |     |     |     |     |     |     |     |     |
| CTL Killing                   |   | --- | +++ | --- | +++ |     | --- | +++ | +   | ++  |
| Fas/FasL Killing              |   | --- | +++ | --- | +++ |     | --- | +++ | +   | +   |
| <b>Bacterial Outputs</b>      |   |     |     |     |     |     |     |     |     |     |
| Intracellular <i>Mtb</i>      |   | --- | +++ | --- | +++ |     | --- | +++ | ++  | +   |
| Extracellular <i>Mtb</i>      | - | --- | ++  | --- | +++ |     | --- | +++ | ++  | +   |
| CFU per Lesion                | - | --- | +++ | --- | +++ |     | --- | +++ | ++  | +   |
| CFU/CEQ                       |   | --- | +++ | --- | +++ |     | --- | +   | +++ | ++  |
| <b>Cellular-Level Outputs</b> |   |     |     |     |     |     |     |     |     |     |
| M <sub>r</sub>                |   |     |     |     |     | +   |     | -   |     | +   |
| M <sub>i</sub>                | - | --- | ++  | --- | +++ |     | --- | +++ | ++  | +   |
| M <sub>ci</sub>               |   | --- | +++ | --- | +++ |     | --- | +++ | +   | +   |
| M <sub>a</sub>                |   | +++ | --  | +++ | --- | +++ | +++ | --- | -   | +   |
| T <sub>g</sub>                |   |     |     |     |     | --- | +++ | +++ | -   |     |
| T <sub>c</sub>                |   |     |     |     |     | -   | +++ | +++ | -   |     |
| T <sub>r</sub>                |   |     |     |     |     |     | +++ | +++ | -   |     |
| <b>Tissue-Level Outputs</b>   |   |     |     |     |     |     |     |     |     |     |
| Caseous Necrosis              | + | +++ | --- | +++ | --- | +++ |     | --- | -   | +   |
| Lesion Size                   |   |     |     | --  | ++  |     | --- | +++ |     |     |
| [TNF-α]                       | + | +++ | --- | +++ | --- | +++ | ++  | --- | --- | +   |
| [IL-10]                       |   | --- | -   |     |     | -   |     | +++ | +++ | +++ |
| [Chemokines]                  |   |     | -   |     |     | -   | +++ |     |     | +   |

Significant PRCC values are as follows: -/+ 0.005 < p < 0.05 --/+ 0.0005 < p < 0.005 ---/+ 0.0005 < p < 0.0005

PRCC and significance values calculated from N = 250 simulations with 4 replications each

M<sub>i</sub> = Infected Macrophages, M<sub>ci</sub> = Chronically Infected Macrophages, M<sub>a</sub> = Activated Macrophages, M<sub>r</sub> = Resting Macrophages, T<sub>g</sub> = Pro-inflammatory T cells, T<sub>c</sub> = Cytotoxic T cells, T<sub>r</sub> = Regulatory T cells

CTL = Cytotoxic, CFU = Colony Forming Units, CEQ = Chromosome Equivalents

Parameters are defined herein or in Cilfone et al. (3)

## References

1. Fallahi-Sichani, M., M. El-Kebir, S. Marino, D. E. Kirschner, and J. J. Linderman. 2011. Multiscale computational modeling reveals a critical role for TNF- $\alpha$  receptor 1 dynamics in tuberculosis granuloma formation. *J. Immunol.* 186: 3472–83.
2. Fallahi-Sichani, M., D. E. Kirschner, and J. J. Linderman. 2012. NF- $\kappa$ B Signaling Dynamics Play a Key Role in Infection Control in Tuberculosis. *Front. Physiol.* 3: 170.
3. Cilfone, N. A., C. R. Perry, D. E. Kirschner, and J. J. Linderman. 2013. Multi-scale modeling predicts a balance of tumor necrosis factor- $\alpha$  and interleukin-10 controls the granuloma environment during Mycobacterium tuberculosis infection. *PLoS One* 8: e68680.
4. Gong, C., J. T. Mattila, M. Miller, J. L. Flynn, J. J. Linderman, and D. Kirschner. 2013. Predicting lymph node output efficiency using systems biology. *J. Theor. Biol.* 335C: 169–184.
5. Gordon, S. 2003. Alternative activation of macrophages. *Nat. Rev. Immunol.* 3: 23–35.
6. Mantovani, A., A. Sica, S. Sozzani, P. Allavena, A. Vecchi, and M. Locati. 2004. The chemokine system in diverse forms of macrophage activation and polarization. *Trends Immunol.* 25: 677–86.
7. Tolle, L. B., and T. J. Standiford. 2013. Danger-associated molecular patterns (DAMPs) in acute lung injury. *J. Pathol.* 229: 145–56.
8. Rubtsov, Y. P., J. P. Rasmussen, E. Y. Chi, J. Fontenot, L. Castelli, X. Ye, P. Treuting, L. Siewe, A. Roers, W. R. Henderson, W. Muller, and A. Y. Rudensky. 2008. Regulatory T cell-derived interleukin-10 limits inflammation at environmental interfaces. *Immunity* 28: 546–58.
9. Hall, B. M., N. D. Verma, G. T. Tran, and S. J. Hodgkinson. 2011. Distinct regulatory CD4<sup>+</sup>T cell subsets; differences between naïve and antigen specific T regulatory cells. *Curr. Opin. Immunol.* 23: 641–7.
10. Lin, P. L., M. Rodgers, L. Smith, M. Bigbee, A. Myers, C. Bigbee, I. Chiosea, S. V Capuano, C. Fuhrman, E. Klein, and J. L. Flynn. 2009. Quantitative comparison of active and latent tuberculosis in the cynomolgus macaque model. *Infect. Immun.* 77: 4631–42.

11. Lin, P. L., C. B. Ford, M. T. Coleman, A. J. Myers, R. Gawande, T. Ioerger, J. Sacchettini, S. M. Fortune, and J. L. Flynn. 2014. Sterilization of granulomas is common in active and latent tuberculosis despite within-host variability in bacterial killing. *Nat. Med.* 20: 75–9.
12. Lin, P. L., T. Coleman, J. P. J. Carney, B. J. Lopresti, J. Tomko, D. Fillmore, V. Dartois, C. Scanga, L. J. Frye, C. Janssen, E. Klein, C. E. Barry, and J. L. Flynn. 2013. Radiologic responses in cynomolgous macaques for assessing tuberculosis chemotherapy regimens. *Antimicrob. Agents Chemother.* 57: 4237–44.
13. Lin, P. L., V. Dartois, P. J. Johnston, C. Janssen, L. Via, M. B. Goodwin, E. Klein, C. E. Barry, and J. L. Flynn. 2012. Metronidazole prevents reactivation of latent *Mycobacterium tuberculosis* infection in macaques. *Proc. Natl. Acad. Sci. U. S. A.* 109: 14188–93.
